# Supplementary material for: Evidence Update on the Relationship between Diet and the Most Common Cancers from the European Prospective Investigation into Cancer and Nutrition (EPIC) Study: A Systematic Review
Source: MDPI journal article supplement (doi:10.3390/nu13103582), 2021-10-13
Supplement: s1 [file s1]

## Supplementary Material

**Table S1.** Search terms used in databases.

| <b>MEDLINE (via PubMed)</b>                                                                                                                                                                                                                                                                                                                                      |
|------------------------------------------------------------------------------------------------------------------------------------------------------------------------------------------------------------------------------------------------------------------------------------------------------------------------------------------------------------------|
| ((("european prospective investigation into cancer" OR "european prospective investigation into cancer and nutrition" OR "EPIC study") AND ("lung cancer" OR "prostate cancer" OR "breast cancer" OR "colorectal cancer" OR "colon cancer" OR "rectal cancer") AND ("diet" OR "intake" OR "nutrients")))                                                         |
| <b>Scopus</b>                                                                                                                                                                                                                                                                                                                                                    |
| (TITLE-ABS-KEY ( ( "european prospective investigation into cancer" OR "european prospective investigation into cancer and nutrition" OR "EPIC study" ) ) AND TITLE-ABS-KEY ("lung cancer" OR "prostate cancer" OR "breast cancer" OR "colorectal cancer" OR "colon cancer" OR "rectal cancer" ) ) AND TITLE-ABS-KEY ( ( "diet" OR "intake" OR "nutrients" ) ) ) |
| <b>Web of Science</b>                                                                                                                                                                                                                                                                                                                                            |
| ((("european prospective investigation into cancer" OR "european prospective investigation into cancer and nutrition" OR "EPIC study")) AND TEMA: (("lung cancer" OR "prostate cancer" OR "breast cancer" OR "colorectal cancer" OR "colon cancer" OR "rectal cancer")) AND TEMA: (("diet" OR "intake" OR "nutrients")))                                         |

**Table S2.** Joanna Briggs Institute Critical Appraisal Tool for Systematic Reviews.

|                                                                                                               | <b>Yes</b>               | <b>No</b>                | <b>Unclear</b>           | <b>Not applicable</b>    |
|---------------------------------------------------------------------------------------------------------------|--------------------------|--------------------------|--------------------------|--------------------------|
| 1. Were the two groups similar and recruited from the same population?                                        | <input type="checkbox"/> | <input type="checkbox"/> | <input type="checkbox"/> | <input type="checkbox"/> |
| 2. Were the exposures measured similarly to assign people to both exposed and unexposed groups?               | <input type="checkbox"/> | <input type="checkbox"/> | <input type="checkbox"/> | <input type="checkbox"/> |
| 3. Was the exposure measured in a valid and reliable way?                                                     | <input type="checkbox"/> | <input type="checkbox"/> | <input type="checkbox"/> | <input type="checkbox"/> |
| 4. Were confounding factors identified?                                                                       | <input type="checkbox"/> | <input type="checkbox"/> | <input type="checkbox"/> | <input type="checkbox"/> |
| 5. Were strategies to deal with confounding factors stated?                                                   | <input type="checkbox"/> | <input type="checkbox"/> | <input type="checkbox"/> | <input type="checkbox"/> |
| 6. Were the groups/participants free of the outcome at the start of the study (or at the moment of exposure)? | <input type="checkbox"/> | <input type="checkbox"/> | <input type="checkbox"/> | <input type="checkbox"/> |
| 7. Were the outcomes measured in a valid and reliable way?                                                    | <input type="checkbox"/> | <input type="checkbox"/> | <input type="checkbox"/> | <input type="checkbox"/> |
| 8. Was the follow up time reported and sufficient to be long enough for outcomes to occur?                    | <input type="checkbox"/> | <input type="checkbox"/> | <input type="checkbox"/> | <input type="checkbox"/> |
| 9. Was follow up complete, and if not, were the reasons to loss to follow up described and explored?          | <input type="checkbox"/> | <input type="checkbox"/> | <input type="checkbox"/> | <input type="checkbox"/> |
| 10. Were strategies to address incomplete follow up utilized?                                                 | <input type="checkbox"/> | <input type="checkbox"/> | <input type="checkbox"/> | <input type="checkbox"/> |
| 11. Was appropriate statistical analysis used?                                                                | <input type="checkbox"/> | <input type="checkbox"/> | <input type="checkbox"/> | <input type="checkbox"/> |

**Table S3.** Quality assessment of included articles.

| Study                             | Item 1 | Item 2 | Item 3 | Item 4 | Item 5 | Item 6 | Item 7 | Item 8 | Item 9 | Item 10 | Item 11 | Quality Category |
|-----------------------------------|--------|--------|--------|--------|--------|--------|--------|--------|--------|---------|---------|------------------|
| Abbas 2013 [72]                   | N/A    | N/A    | ✓      | ✓      | ✓      | ✓      | ✓      | ✓      | ✓      | N/A     | ✓       | High             |
| Allen 2007 [122]                  | ✓      | ✓      | ✓      | ✓      | ✓      | ✓      | ✓      | ✓      | ✓      | N/A     | ✓       | High             |
| Allen, Key 2008 [115]             | ✗      | ✓      | ✓      | ✓      | ✓      | ✓      | ✓      | ✓      | ✓      | N/A     | ✓       | High             |
| Allen, Naomi 2008 [124]           | ✗      | ✓      | ✓      | ✓      | ✓      | ✓      | ✓      | ✓      | ✓      | N/A     | ✓       | High             |
| Aglago 2020 [27]                  | ✗      | ✓      | ✓      | ✓      | ✓      | ✓      | ✓      | ✓      | ✓      | N/A     | ✓       | High             |
| Agnoli 2013 [34]                  | N/A    | N/A    | ✓      | ✓      | ✓      | ✓      | ✓      | ✓      | ✓      | N/A     | ✓       | High             |
| Assi 2016 [80]                    | N/A    | N/A    | ✓      | ✓      | ✓      | ✓      | ✓      | ✓      | ✓      | N/A     | ✓       | High             |
| Assi 2020 [78]                    | ✗      | ✓      | ✓      | ✓      | ✓      | ✓      | ✓      | ✓      | ✓      | N/A     | ✓       | High             |
| Aleksandrova 2014 [40]            | N/A    | N/A    | ✓      | ✓      | ✓      | ✓      | ✓      | ✓      | ✓      | N/A     | ✓       | High             |
| Bakker 2016 [81]                  | ✓      | ✓      | ✓      | ✓      | ✓      | ✓      | ✓      | ✓      | ✓      | N/A     | ✓       | High             |
| Bamia 2013 [35]                   | N/A    | N/A    | ✓      | ✓      | ✓      | ✓      | ✓      | ✓      | ✓      | N/A     | ✓       | High             |
| Bendinelli 2020 [38]              | ✗      | ✓      | ✓      | ✓      | ✓      | ✓      | ✓      | ✓      | ✓      | N/A     | ✓       | High             |
| Bhoo-Pathy 2015 [79]              | N/A    | N/A    | ✓      | ✓      | ✓      | ✓      | ✓      | ✓      | ✓      | N/A     | ✓       | High             |
| Bingham 2005 [24]                 | N/A    | N/A    | ✓      | ✓      | ✓      | ✓      | ✓      | ✓      | ✓      | N/A     | ✓       | High             |
| Büchner 2010 [101]                | N/A    | N/A    | ✓      | ✓      | ✓      | ✓      | ✓      | ✓      | ✓      | N/A     | ✓       | High             |
| Buckland 2012 [88]                | N/A    | N/A    | ✓      | ✓      | ✓      | ✓      | ✓      | ✓      | ✓      | N/A     | ✓       | High             |
| Buckland 2013 [74]                | N/A    | N/A    | ✓      | ✓      | ✓      | ✓      | ✓      | ✓      | ✓      | N/A     | ✓       | High             |
| Chajès 2008 [83]                  | ✗      | ✓      | ✓      | ✓      | ✓      | ✓      | ✓      | ✓      | ✓      | N/A     | ✓       | High             |
| Chajès 2017 [84]                  | ✗      | ✓      | ✓      | ✓      | ✓      | ✓      | ✓      | ✓      | ✓      | N/A     | ✓       | High             |
| Crowe, Allen 2008 [125]           | ✗      | ✓      | ✓      | ✓      | ✓      | ✓      | ✓      | ✓      | ✓      | N/A     | ✓       | High             |
| Crowe, Key 2008 [114]             | N/A    | N/A    | ✓      | ✓      | ✓      | ✓      | ✓      | ✓      | ✓      | N/A     | ✓       | High             |
| de Batlle 2015 [98]               | N/A    | N/A    | ✓      | ✓      | ✓      | ✓      | ✓      | ✓      | ✓      | N/A     | ✓       | High             |
| Dahm 2012 [129]                   | N/A    | N/A    | ✓      | ✓      | ✓      | ✓      | ✓      | ?      | ✓      | N/A     | ✓       | High             |
| Deschasaux 2018 [36]              | N/A    | N/A    | ✓      | ✓      | ✓      | ✓      | ✓      | ✓      | ✓      | N/A     | ✓       | High             |
| Emaus 2016 [66]                   | N/A    | N/A    | ✓      | ✓      | ✓      | ✓      | ✓      | ✓      | ✓      | N/A     | ✓       | High             |
| Engeset 2006 [70]                 | N/A    | N/A    | ✓      | ✓      | ✓      | ✓      | ✓      | ✓      | ✓      | N/A     | ✓       | High             |
| Engeset 2009 [65]                 | N/A    | N/A    | ✓      | ✓      | ✓      | ✓      | ✓      | ✓      | ✓      | N/A     | ✓       | High             |
| Eussen, Vollset, Hustad 2010 [47] | ✓      | ✓      | ✓      | ✓      | ✓      | ✓      | ✓      | ✓      | ✓      | N/A     | ✓       | High             |
| Eussen, Vollset, Igland 2010 [41] | ✓      | ✓      | ✓      | ✓      | ✓      | ✓      | ✓      | ✓      | ✓      | N/A     | ✓       | High             |
| Fedirko 2012 [46]                 | N/A    | N/A    | ✓      | ✓      | ✓      | ✓      | ✓      | ✓      | ✓      | N/A     | ✓       | High             |
| Ferrari 2007 [42]                 | N/A    | N/A    | ✓      | ✓      | ✓      | ✓      | ✓      | ✓      | ✓      | N/A     | ✓       | High             |
| Ferrari 2013 [69]                 | N/A    | N/A    | ✓      | ✓      | ✓      | ✓      | ✓      | ✓      | ✓      | N/A     | ✓       | High             |
| Gibbs 2020 [45]                   | ✗      | ✓      | ✓      | ✓      | ✓      | ✓      | ✓      | ✓      | ✓      | N/A     | ✓       | High             |
| Heath 2020 [76]                   | ✓      | ✓      | ✓      | ✓      | ✓      | ✓      | ✓      | ✓      | ✓      | N/A     | ✓       | High             |
| Hughes 2015 [60]                  | ✓      | ✓      | ✓      | ✓      | ✓      | ✓      | ✓      | ✓      | ✓      | N/A     | ✓       | High             |
| Jakszyn 2012 [130]                | N/A    | N/A    | ✓      | ✓      | ✓      | ✓      | ✓      | ✓      | ✓      | N/A     | ✓       | High             |
| Jakszyn 2020 [130]                | N/A    | N/A    | ✓      | ✓      | ✓      | ✓      | ✓      | ✓      | ✓      | N/A     | ✓       | High             |
| Jenab 2004 [26]                   | N/A    | N/A    | ✓      | ✓      | ✓      | ✓      | ✓      | ✓      | ✓      | N/A     | ✓       | High             |
| Jenab 2007 [58]                   | ✓      | ✓      | ✓      | ✓      | ✓      | ✓      | ✓      | ✓      | ✓      | N/A     | ✓       | High             |
| Jenab 2010 [30]                   | ✓      | ✓      | ✓      | ✓      | ✓      | ✓      | ✓      | ✓      | ✓      | N/A     | ✓       | High             |
| Johansson 2010 [106]              | ?      | ✓      | ✓      | ✓      | ✓      | ✓      | ✓      | ?      | ✓      | N/A     | ✓       | High             |
| Keinan-Boker 2004 [93]            | N/A    | N/A    | ✓      | ✓      | ✓      | ✓      | ✓      | ✓      | ✓      | N/A     | ✓       | High             |
| Kesse 2006 [56]                   | N/A    | N/A    | ✓      | ✓      | ✓      | ✓      | ✓      | ✓      | ✓      | N/A     | ✓       | High             |
| Key 2004 [111]                    | N/A    | N/A    | ✓      | ✓      | ✓      | ✓      | ✓      | ✓      | ✓      | N/A     | ✓       | High             |
| Key 2007 [123]                    | ✓      | ✓      | ✓      | ✓      | ✓      | ✓      | ✓      | ✓      | ✓      | N/A     | ✓       | High             |
| Key 2009 [57]                     | N/A    | N/A    | ✓      | ✓      | ✓      | ✓      | ✓      | ?      | ✓      | N/A     | ✓       | High             |
| Kyrø 2014 [49]                    | ✓      | ✓      | ✓      | ✓      | ✓      | ✓      | ✓      | ✓      | ✓      | N/A     | ✓       | High             |
| Kyrø 2015 [99]                    | N/A    | N/A    | ✓      | ✓      | ✓      | ✓      | ✓      | ✓      | ✓      | N/A     | ✓       | High             |
| Leenders 2014 [48]                | ✓      | ✓      | ✓      | ✓      | ✓      | ✓      | ✓      | ✓      | ✓      | N/A     | ✓       | High             |
| Leenders 2015 [22]                | N/A    | N/A    | ✓      | ✓      | ✓      | ✓      | ✓      | ✓      | ✓      | N/A     | ✓       | High             |
| Li 2011 [54]                      | N/A    | N/A    | ✓      | ✓      | ✓      | ✓      | ✓      | ✓      | ✓      | N/A     | ✓       | High             |
| Linseisen 2007 [102]              | N/A    | N/A    | ✓      | ✓      | ✓      | ✓      | ✓      | ✓      | ✓      | N/A     | ✓       | High             |
| Linseisen 2011 [104]              | N/A    | N/A    | ✓      | ✓      | ✓      | ✓      | ✓      | ✓      | ✓      | N/A     | ✓       | High             |
| Linseisen 2021 [55]               | ✗      | ✓      | ✓      | ✓      | ✓      | ✓      | ✓      | ✓      | ✓      | N/A     | ✓       | High             |
| Loh 2010 [53]                     | ✗      | ✓      | ✓      | ✓      | ✓      | ✓      | ✓      | ?      | ✓      | N/A     | ✓       | High             |
| Maillard 2010 [95]                | ✓      | ✓      | ✓      | ✓      | ✓      | ✓      | ✓      | ✓      | ✓      | N/A     | ✓       | High             |
| Masala 2012 [67]                  | N/A    | N/A    | ✓      | ✓      | ✓      | ✓      | ✓      | ✓      | ✓      | N/A     | ✓       | High             |
| Masala 2017 [90]                  | ✓      | ✓      | ✓      | ✓      | ✓      | ✓      | ✓      | ✓      | ✓      | N/A     | ✓       | High             |
| Matejcic 2017 [100]               | ✗      | ✓      | ✓      | ✓      | ✓      | ✓      | ✓      | ✓      | ✓      | N/A     | ✓       | High             |
| Matta 2021 [82]                   | N/A    | N/A    | ✓      | ✓      | ✓      | ✓      | ✓      | ✓      | ✓      | N/A     | ✓       | High             |
| Miller 2004 [103]                 | N/A    | N/A    | ✓      | ✓      | ✓      | ✓      | ✓      | ?      | ✓      | N/A     | ✓       | High             |

|                            |      |     |     |     |     |     |     |      |     |     |     |      |
|----------------------------|------|-----|-----|-----|-----|-----|-----|------|-----|-----|-----|------|
| Moskal 2016 [62]           | N/A  | N/A | ✓   | ✓   | ✓   | ✓   | ✓   | ✓    | ✓   | N/A | ✓   | High |
| Mullee 2019 [44]           | N/A  | N/A | ✓   | ✓   | ✓   | ✓   | ✓   | ✓    | ✓   | N/A | ✓   | High |
| Murphy 2012 [25]           | N/A  | N/A | ✓   | ✓   | ✓   | ✓   | ✓   | ✓    | ✓   | N/A | ✓   | High |
| Murphy 2013 [31]           | N/A  | N/A | ✓   | ✓   | ✓   | ✓   | ✓   | ✓    | ✓   | N/A | ✓   | High |
| Murphy 2019 [39]           | N/A  | N/A | ✓   | ✓   | ✓   | ✓   | ✓   | ✓    | ✓   | N/A | ✓   | High |
| Myint 2019 [107]           | N/A  | N/A | ✓   | ✓   | ✓   | ✓   | ✓   | ✓    | ✓   | N/A | ✓   | High |
| Nagel 2010 [96]            | N/A  | N/A | ✓   | ✓   | ✓   | ✓   | ✓   | ✓    | ✓   | N/A | ✓   | High |
| Nimptsch 2008 [118]        | N/A  | N/A | ✓   | ✓   | ✓   | ✓   | ✓   | ✓    | ✓   | N/A | ✓   | High |
| Nimptsch 2009 [119]        | ✓    | ✓   | ✓   | ✓   | ✓   | ✓   | ✓   | ✓    | ✓   | N/A | ✓   | High |
| Nimptsch 2010 [108]        | N/A  | N/A | ✓   | ✓   | ✓   | ✓   | ✓   | ✓    | ✓   | N/A | ✓   | High |
| Nitter 2014 [50]           | ✗    | ✓   | ✓   | ✓   | ✓   | ✓   | ✓   | ✓    | ✓   | N/A | ✓   | High |
| Norat 2005 [28]            | N/A  | N/A | ✓   | ✓   | ✓   | ✓   | ✓   | ✓    | ✓   | N/A | ✓   | High |
| Pala 2009 [71]             | N/A  | N/A | ✓   | ✓   | ✓   | ✓   | ✓   | ✓    | ✓   | N/A | ✓   | High |
| Pala 2011 [32]             | N/A  | N/A | ✓   | ✓   | ✓   | ✓   | ✓   | ✓    | ✓   | N/A | ✓   | High |
| Papadimitriou 2020 [131]   | ?    | ✓   | ✓   | ✓   | ✓   | ✓   | ✓   | ✓    | ✓   | N/A | ✓   | High |
| Park 2009 [43]             | N/A  | N/A | ✓   | ✓   | ✓   | ✓   | ✓   | ✓    | ✓   | N/A | ✓   | High |
| Perez-Cornago 2017 [112]   | N/A  | N/A | ✓   | ✓   | ✓   | ✓   | ✓   | ✓    | ✓   | N/A | ✓   | High |
| Perez-Cornago 2020 [120]   | N/A  | N/A | ✓   | ✓   | ✓   | ✓   | ✓   | ✓    | ✓   | N/A | ✓   | High |
| Price 2010 [121]           | ✓    | ✓   | ✓   | ✓   | ✓   | ✓   | ✓   | ✓    | ✓   | N/A | ✓   | High |
| Rohrmann 2006 [105]        | N/A  | N/A | ✓   | ✓   | ✓   | ✓   | ✓   | ✓    | ✓   | N/A | ✓   | High |
| Rohrmann 2008 [116]        | N/A  | N/A | ✓   | ✓   | ✓   | ✓   | ✓   | ✓    | ✓   | N/A | ✓   | High |
| Romieu 2012 [85]           | N/A  | N/A | ✓   | ✓   | ✓   | ✓   | ✓   | ✓    | ✓   | N/A | ✓   | High |
| Romieu 2015 [77]           | N/A  | N/A | ✓   | ✓   | ✓   | ✓   | ✓   | ✓    | ✓   | N/A | ✓   | High |
| Romieu 2017 [91]           | N/A  | N/A | ✓   | ✓   | ✓   | ✓   | ✓   | ✓    | ✓   | N/A | ✓   | High |
| Rothwell 2020 [51]         | ✗    | ✓   | ✓   | ✓   | ✓   | ✓   | ✓   | ✓    | ✓   | N/A | ✓   | High |
| Sen 2019 [117]             | N/A  | N/A | ✓   | ✓   | ✓   | ✓   | ✓   | ✓    | ✓   | N/A | ✓   | High |
| Sieri 2008 [94]            | N/A  | N/A | ✓   | ✓   | ✓   | ✓   | ✓   | ✓    | ✓   | N/A | ✓   | High |
| Sieri 2013 [86]            | N/A  | N/A | ✓   | ✓   | ✓   | ✓   | ✓   | ✓    | ✓   | N/A | ✓   | High |
| Sieri 2015 [33]            | N/A  | N/A | ✓   | ✓   | ✓   | ✓   | ✓   | ✓    | ✓   | N/A | ✓   | High |
| Spencer 2009 [87]          | N/A  | N/A | ✓   | ✓   | ✓   | ✓   | ✓   | ✓    | ✓   | N/A | ✓   | High |
| Steinbrecher 2010 [128]    | ✗    | ✓   | ✓   | ✓   | ✓   | ✓   | ✓   | ?    | ✓   | N/A | ✓   | High |
| Stepien 2017 [52]          | ✗    | ✓   | ✓   | ✓   | ✓   | ✓   | ✓   | ?    | ✓   | N/A | ✓   | High |
| Suzuki 2009 [113]          | N/A  | N/A | ✓   | ✓   | ✓   | ✓   | ✓   | ✓    | ✓   | N/A | ✓   | High |
| Thiebaut 2001 [92]         | N/A  | N/A | ✓   | ✓   | ✓   | ✓   | ✓   | ✓    | ✓   | N/A | ✓   | High |
| Tjønneland 2007 [89]       | N/A  | N/A | ✓   | ✓   | ✓   | ✓   | ✓   | ✓    | ✓   | N/A | ✓   | High |
| Travis 2008 [75]           | ✗    | ✓   | ✓   | ✓   | ✓   | ✓   | ✓   | ✓    | ✓   | N/A | ✓   | High |
| Travis, Spencer 2009 [127] | ?    | ✓   | ✓   | ✓   | ✓   | ✓   | ✓   | ✓    | ✓   | N/A | ✓   | High |
| Travis, Crowe 2009 [126]   | ✓    | ✓   | ✓   | ✓   | ✓   | ✓   | ✓   | ✓    | ✓   | N/A | ✓   | High |
| Trichopoulou 2010 [73]     | N/A  | N/A | ✓   | ✓   | ✓   | ✓   | ✓   | ✓    | ✓   | N/A | ✓   | High |
| van Duijnhoven 2009 [21]   | N/A  | N/A | ✓   | ✓   | ✓   | ✓   | ✓   | ✓    | ✓   | N/A | ✓   | High |
| van Gils 2005 [68]         | N/A  | N/A | ✓   | ✓   | ✓   | ✓   | ✓   | ✓    | ✓   | N/A | ✓   | High |
| Vece 2015 [61]             | N/A  | N/A | ✓   | ✓   | ✓   | ✓   | ✓   | ✓    | ✓   | N/A | ✓   | High |
| Ward 2010 [59]             | ✓    | ✓   | ✓   | ✓   | ✓   | ✓   | ✓   | ✓    | ✓   | N/A | ✓   | High |
| Ward 2016 [29]             | N/A  | N/A | ✓   | ✓   | ✓   | ✓   | ✓   | ✓    | ✓   | N/A | ✓   | High |
| Ward 2019 [109]            | N/A  | N/A | ✓   | ✓   | ✓   | ✓   | ✓   | ✓    | ✓   | N/A | ✓   | High |
| Zamora-Ros 2013 [97]       | N/A  | N/A | ✓   | ✓   | ✓   | ✓   | ✓   | ✓    | ✓   | N/A | ✓   | High |
| Zamora-Ros 2017 [63]       | N/A  | N/A | ✓   | ✓   | ✓   | ✓   | ✓   | ✓    | ✓   | N/A | ✓   | High |
| Zamora-Ros 2018 [64]       | N/A  | N/A | ✓   | ✓   | ✓   | ✓   | ✓   | ✓    | ✓   | N/A | ✓   | High |
| Zuo 2018 [110]             | ✗    | N/A | ✓   | ✓   | ✓   | ✓   | ✓   | ✓    | ✓   | N/A | ✓   | High |
| <b>Criterion Score %</b>   | 44.7 | 100 | 100 | 100 | 100 | 100 | 100 | 93.6 | 100 | N/A | 100 |      |

Note that the criterion score is calculated by dividing the number of studies meeting one criterion by the total number of studies. ✓: meet the methodological quality criterion; ✗: not meet the methodological quality criterion; ?: unclear; N/A: not applicable.
